# Supplementary material
Source: PubMed Central journal article supplement (PMC4505759)
Supplement: Supp_Table1.pdf [file Supp_Table1.pdf]

## Supplementary Data

SUPPLEMENTARY TABLE S1. A REFERENCE SET OF 66 SEQUENCES WAS DOWNLOADED FROM THE LOS ALAMOS HIV DATABASE ([www.hiv.lanl.gov/content/index](http://www.hiv.lanl.gov/content/index))

| <i>Country</i>     | <i>Nucleotide sequence accession numbers</i>                                                                                          |
|--------------------|---------------------------------------------------------------------------------------------------------------------------------------|
| Dominican Republic | DQ023719–DQ023738, DQ023740–DQ023756, EU439709, EU439711, EU439715, EU439716, EU439760–EU439772, EU839596–EU839598, JN713567–JN713709 |
| United States      | AF013420, AF027392, AF072936, AF047280, AF079468, AF088078, AF292712, AF294515, AY000001, AF383883                                    |
| Martinique         | JF937442–JF937446                                                                                                                     |
| Trinidad-Tobago    | JF937502–JF967506                                                                                                                     |
| Puerto Rico        | KC865058, KC865074, KC865095, KC865114, KC865134, KC865164, KC865173,                                                                 |
| Haiti              | HQ171856–HQ171875, JF967532–JF937541                                                                                                  |
| Jamaica            | JN135105–JN135109                                                                                                                     |
